# Supplementary material for: Size scaling of large landslides from incomplete inventories
Source: Copernicus journal article supplement (doi:10.5194/nhess-24-3815-2024), 2024-11-08
Supplement: Supplementary file 1 [file nhess-24-3815-2024-supplement.zip]

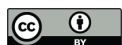

## *Supplement of*

# **Size scaling of large landslides from incomplete inventories**

**Oliver Korup et al.**

*Correspondence to:* Oliver Korup ([korup@uni-potsdam.de](mailto:korup@uni-potsdam.de))

- [nhess-24-3815-2024-supplement-title-page.pdf](#)
- [NHESS-2024-55-CodeDoc.nb.html](#)

The copyright of individual parts of the supplement might differ from the article licence.
